# Supplementary material for: Ethanol metabolism and oxidative stress are required for unfolded protein response activation and steatosis in zebrafish with alcoholic liver disease
Source: PubMed Central journal article supplement (PMC3759341; doi:10.1242/dmm.012195), 2013-06-20
Supplement: supp_012195_DMM012195.pdf [file supp_012195_DMM012195.pdf]

## Supplemental material

### Supplemental Figure S1. Ethanol induces lordosis and edema in a dose- and time-

**dependent manner.** (A) Zebrafish larvae were exposed to either 0 mM or 350 mM ethanol for 32 hours starting from 96 hpf to 128 hpf. Larvae were scored at 4-hour time intervals as affected if they displayed at least one abnormality (death, lordosis, edema, or a combination of phenotypes). The average of ten clutches is plotted ( $n=442$  for each cohort, mean  $\pm$  s.e.m.); statistical analysis was determined by two-way ANOVA and Bonferroni's post-hoc test. Except for the 4 hours, all time points on the 350 mM curve are significantly different ( $p<0.001$ ) compared to 0 hours as well as corresponding time points on the 0 mM curve. The points marked with (a) are not statistically different from one another. (B) Larvae treated with 350 mM ethanol were scored for lordosis and edema over 32 hours of exposure. Note that most fish had both phenotypes. The average of thirteen clutches ( $n=562$ , mean  $\pm$  s.e.m.) is plotted for each abnormality; statistical analysis of each phenotype was calculated by one-way ANOVA and Tukey's post-hoc test. All time points starting from 8 hours on the lordosis curve and from 12 hours on the edema curve are significantly different ( $p<0.001$ ) compared to the time point of 0 hours. All time points on both curves are significantly different ( $p<0.001$ ) from the time point of 32 hours except for 28 hours as indicated by (a) and (b) for lordosis and edema, respectively.

### Supplemental Figure S2. Ethanol induces UPR.

(A) Livers dissected from larvae exposed to 0 or 350 mM ethanol at 96-128 hpf were subject to standard PCR with *xbp1* primers, and the products were run in 4% agarose gel to achieve efficient separation of spliced and unspliced bands. The image is inverted. The spliced and unspliced bands were quantified, added to make 100%. Fold changes were calculated by normalizing the percentage of spliced bands of ethanol-treated samples to that of untreated samples and plotted in Figure 2B. (B) Immunoblot of Bip

and phosphorylated Eif2 $\alpha$  of livers dissected from larvae exposed to 0 or 350 mM ethanol at 96-128 hpf. For each time point, protein was extracted from exactly 20 livers.

**Supplemental Figure S3. Homologs of ethanol metabolizing enzymes are expressed in zebrafish.** (A) The protein sequence alignment of zebrafish (*Danio rerio*; Dr) Cyp2y3 and Cyp2p6 with that of human CYP2E1 (Hs) and mouse Cyp2e1 (Mm). Cyp2y3 and Cyp2p6 show 43% identity to human CYP2E1. The pink box highlights the substrate-binding site, which is also a part of the antibody-binding site. (B) Representative PCR agarose gels of *adh5*, *adh8a*, *adh8b*, *cyp2y3*, *cyp2p6*, *aldh2* performed on cDNA prepared from a pool of dissected livers from control (–) and larvae treated with 350 mM ethanol (+) for 32 hours. *rpp0* serves as a reference gene. (C-E) Immunoblots of proteins from 10-25 livers per sample using antibodies raised against human ADH1 and CYP2E1. VL-17A cells stably expressing mouse Adh1 and human CYP2E1 served as a positive control.

**Supplemental Figure S4. Optimization of CMZ, 4MP, CYA, and OAc in zebrafish larvae.** Viability of larvae treated with 0-100  $\mu$ M CMZ (A), or 0-15 mM 4MP (C), or 0-10 mM CYA (E), or 0-500 mM OAc (F) was scored and plotted from the average of at least four clutches. The dashed lines in each plot indicate the optimal concentration. (B) Expression of CYP2E1-immunoreactive proteins is assessed by immunoblotting a pool of 10 zebrafish livers treated as shown. Because CMZ is a suicide inhibitor that results in the degradation of Cyp2e1 homolog, the dose of CMZ that minimizes the ethanol-induced Cyp2e1 expression would be the optimal concentration, which was determined to be 100  $\mu$ M. (D) Western blotting of liver protein extracts using an antibody that was raised against human CYP2E1. Because 4MP is a competitive inhibitor of Cyp2e1, the lowest dose that stabilizes this enzyme in the absence of ethanol would be the optimal concentration of 4MP, which was determined as 1 mM.

**Supplemental Figure S5. Optimization of H<sub>2</sub>O<sub>2</sub> exposure doses to zebrafish larvae as**

**assessed by survival and ROS production. (A)** Zebrafish larvae were exposed to H<sub>2</sub>O<sub>2</sub> at 0 mM, 0.4 mM (0.0010%), 0.9 mM (0.0020%), 1.0 mM (0.0023%), 1.3 mM (0.0030%), 1.7 mM (0.0040%), 2.0 mM (0.0047%), 2.1 mM (0.0050%), 2.6 mM (0.0060%), 3.0 mM (0.0070%), 3.4 mM (0.0080%), 3.8 mM (0.0090%), 4.0 mM (0.0094%), 4.3 mM (0.0100%) concentrations for 24 hours starting from 96 to 120 hpf. Viability at 24 hours was scored and plotted from the average of four clutches (n=60 larvae per treatment, mean ± s.e.m.); \*\*\* p<0.001 vs. 0 mM by one-way ANOVA and Tukey's post-hoc test. Note that 2.1 mM concentration is the lowest dose that introduces mortality. Interestingly, the survivors of any dose did not exhibit any phenotypic abnormality. **(B)** Generation of ROS by whole larvae treated as in **(A)** was measured by CM-H<sub>2</sub>DCFDA fluorescence. Data in each concentration was normalized to 0 mM H<sub>2</sub>O<sub>2</sub> and plotted from the average of four clutches. **(C)** Comparative survival study of zebrafish larvae exposed to 0 mM, 350 mM, 100 mM ethanol, 2.1 mM H<sub>2</sub>O<sub>2</sub>, and 100 mM ethanol in combination with 2.1 mM H<sub>2</sub>O<sub>2</sub>. Viability at 24 hours was scored and plotted from the average of three clutches. Note that the combination of low dose ethanol and H<sub>2</sub>O<sub>2</sub> showed a synergistic response. **(D)** Comparative analysis of ROS production by whole larvae treated as in **(C)**. Data in each treatment was normalized to untreated larvae (0 mM EtOH + 0 mM H<sub>2</sub>O<sub>2</sub>) and plotted from the average of three clutches. The reason why the combination of low dose of ethanol and H<sub>2</sub>O<sub>2</sub> did not increase ROS production may contribute to the fact that the ROS measurement was taken from the survivors only, which was about 50% of the initial population. It is interesting and scary to note that 350 mM ethanol that caused only 10% mortality (Figure 1B, 24 hours) produced high levels of ROS that is comparable to that of 3.8 mM (0.0090%) H<sub>2</sub>O<sub>2</sub> exposure, which resulted in 95% mortality (Figure S5B).

**Supplemental Figure S6. Ethanol-induced HSC activation is partially rescued by CMZ assessed by laminin deposition.** (A-D) show confocal single plane images of *Tg(hand2:EGFP)* expression in the HSCs of larvae treated under different conditions from 96 hpf to 120 hpf. The larvae were fixed immediately after the treatment at 120 hpf. Arrows point to individual HSCs. In control and CMZ-treated larvae, HSCs send out long and multiple cellular processes. Moreover, these HSCs are well segregated from one another. In ethanol (EtOH)-treated larvae, HSCs lose the complex processes, become elongated, and tend to cluster together. In larvae treated with both CMZ and ethanol, the HSC phenotypes seem to be partially suppressed as these cells form short and multiple cellular processes (arrows in D). (A'-D') show the same images of (A-D), but with laminin staining. Ethanol treatment triggers laminin deposition (arrows in C'), whereas co-treatment with ethanol and CMZ suppresses laminin deposition. The blue staining in A' and B' is due to autofluorescence of the red blood cells. (A''-D'') show three-dimensional projection of the confocal Z-stack that scanning through the whole livers in (A-D). In ethanol-treated liver, HSCs are clustered together, whereas in control, CMZ, and CMZ and ethanol co-treated liver, HSCs were well separated from one another. In (A-D'') white dashed lines outline the periphery of the liver. Scale bar: 20  $\mu$ m shown in (A). (E) Quantification of whole mount oil red O staining in 120 hpf larvae that were either untreated (N/T), or pre-treated with 3 mM CYA, 40 mM OAc at 94 hpf and then exposed to 0 or 350 mM ethanol at 96 hpf for 24 hours. Note that neither of these treatments affected the ethanol-induced steatosis.

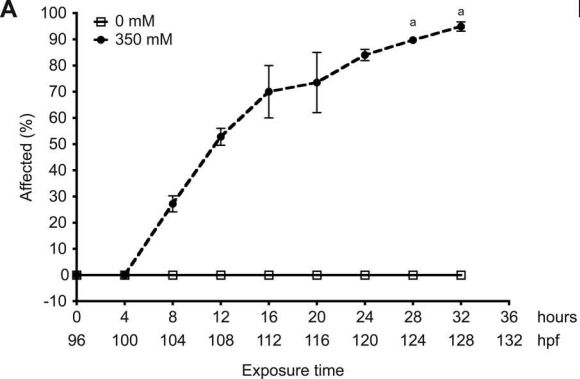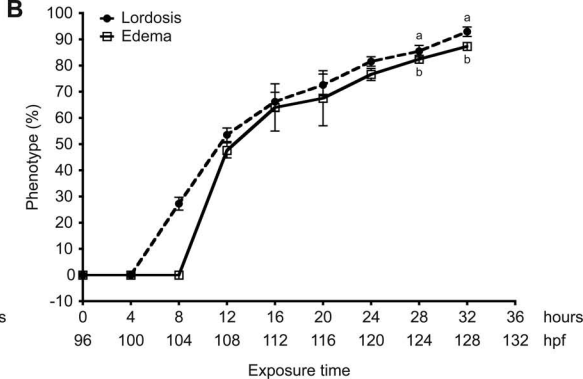

**A**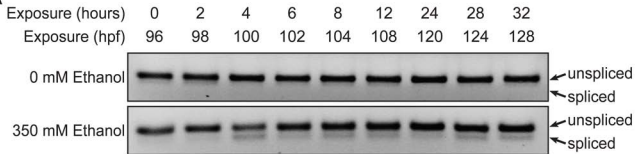**B**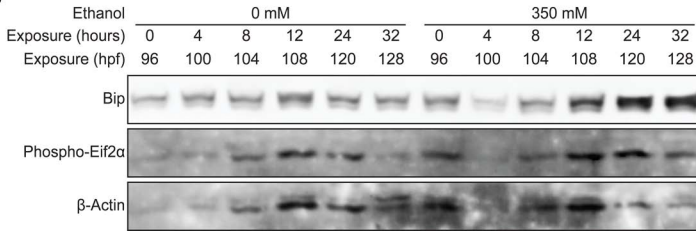

**A**

HsCYP2E1 MSALGV----TVALLVWAAPFLLLVSMRWQVHSSWNLP PGPFP LPIIGNL FQLELKNIPKSFTRLARQRF GVPVFTLYVGSQRVMVHGKYKAVKEALLDYKDEFSGRGDLPAFH-AHRDRGI 114  
 MmCyp2E1 MAVLGI----TVALLVWIATLLVSIWKQIYRSWNLP PGPFPPIFFGNIFQLDKDIPKSLTKLAKRFGPVFTLHGGORRIVVLHGKYKAVKEALLNHNKNEFSGRGDIPVFG-EYKNKI 114  
 DrCyp2y3 MDL5-----SSLLLVLVLVTMLLRWRKKNGLSLPGP LALPIIGNLFLQLDLSAPPKSFMKRKYTGVSMTVHLGQRVNVVUGYEVTKKVALVQDADFAPRAPIFMNRIVKGYGL 113  
 DrCyp2p6 MLLLHYEWIDIKAVLFCACFVLNLSVIRNKT PKNF PPGWALPIIGNLYHIDFNKIHLEVEKLSKEYSVVSHLFGQRTVVLINGYKQKVEVIQQGDNVADREP LPMHDIAGDNGL 120  
 \*: \* \* : \* : \* : : \* : \* \* : \* : \* \* : \* : \* : \* : \* : \* : \* : \* : \* : \* : \* : \* : \* : \* : \* : \* : \* : \* : \* : \* : \* : \* : \* : \* : \* : \* : \* : \* : \* : \*

HsCYP2E1 IFNNGPTWKDIRRFSLTTLRNRYGMKGQNESRIQREAHFLLEALRKTQGGPFDPFTLIGCAPNCVNIADILFNRKFDYNDKFLRLMYLFNENFHL LSTPWLQYLNPPSFLHLYPGSHRK 234  
 MmCyp2E1 IFNNGPTWKDVRFRFSL ILRDWGMKGQNEARIQREAHFLVEELKTKGQPFDPFTLIGCAPNCVNIADILFNKRFDDKCKLELMSLFNENFYLLSTPWIQAYNFSDYLLQYLP GSHRK 234  
 DrCyp2y3 AINSNGERWQLRRFLTLTTLRDFGMGRKRMEQWIQEESRYLKLKSFEEKSKPVDPTFFSRVTSNVICLSVFGQRFYEDKNFLQLLQIISKLLRFLSSPWGLYNI FFPQVMERFSSRHH 233  
 DrCyp2p6 VAPSGYKWKQRRFALSTLRNFGLGKKSLEPSINLECHYLN EASINENGRFPDHL LNNAISNVICLSVLFVGNRFYSDHHFQLLNDINEAMYL DGTWALQYVSIYPRMRL LGGPHK 240  
 \* \* : \* : \* \* : \* : \* : \* : \* \* : \* : \* : \* : \* : \* : \* : \* : \* : \* : \* : \* : \* : \* : \* : \* : \* : \* : \* : \* : \* : \* : \* : \* : \* : \* : \* : \* : \* : \*

HsCYP2E1 VIKNVAEKEYVESRVERKEHHQSLDPCPRDLTDCLLVEMEKEKHS AERLYTMDGITVTVADLRFAGCTETTSTTLRYGLLILMKYPEIEEK LHEEIDRVIGPSRIPAIKDRQEMPYMDAVV 354  
 MmCyp2E1 VMKNVSEIRQYTLGKAKEHLKSLDINCRPDVTDCLLEMEKEKHSQEMPTMENSIVLADLRFAGCTETTSTTLRYGLLILMKYPEIEEK LHEEIDRVIGPSRAPAVDRMNNPYMDAVV 354  
 DrCyp2y3 ILKDVENIRTFIRSKVKEHQRLDFSDFIDCF LRLTQEKDKLDTFHKDNLMATVNLNLFVAGCTETTSTTLRYALMLIKHPQIQEQMQREIDRVIGQRNIPTEMEDRKLSPPTDAVI 353  
 DrCyp2p6 NITLWKVIVDFARERVKHRVDYDPSNPRDYDCFLAEMEKLKDDTAAGFDVENL CICTLDLRFVAGCTETTSTL SWSLLYMIKYPEIQAKVQEIEIDRVIGSSRHPSVSDRNMPPYTN AVI 360  
 : : : : : \* \* \* \* : \* \* : \* \* \* \* : \* : \* : \* : \* : \* : \* : \* : \* : \* : \* : \* : \* : \* : \* : \* : \* : \* : \* : \* : \* : \* : \* : \* : \* : \* : \*

HsCYP2E1 HEIQRFITLPSNLPH EATRDTIFRGYLPKGTVVVPTLSDVLYDNQEFDPDEKFKPEHFLNENGKFKYSDYFKPFS TGRKVCAGEGLARMEFLLLCAILQHFNKLPVDPKIDLSP- 473  
 MmCyp2E1 HEIQRFINLPSNLPH EATRDTVFRGYVPGTKVVIPTLSDLLFDNYEFPDPETFKEPHFLNENGKFKYSDYFKPFS TGRKVCAGEGLARMEFLLLCAILQHFNKLPVDPKIDLSP- 473  
 DrCyp2y3 HEVQQRIDVPLSLPHYAMKDI FTRGYKIPKDTV IIPMLHSVLRDEGWETPWTNPFHFLD SNGFNQKNP AFMFPFSAGKRSCYSGESLARMEFLF TFSLLQKF TSSPNPGDIDLSP- 472  
 DrCyp2p6 HEIQRFGNIAALRLPRAAKDIQVGYLIPKGTIVIGNLTSVLEDESEWETHSNP GHFLDAEGKFRRRDAFLPFS LGKRVCLGQELARMEFLF FTSLQHF TFS--PAGVPSFN 472  
 \* : \* : \* : \* : \* : \* : \* : \* : \* : \* : \* : \* : \* : \* : \* : \* : \* : \* : \* : \* : \* : \* : \* : \* : \* : \* : \* : \* : \* : \* : \* : \* : \* : \* : \* : \*

HsCYP2E1 IHHGFCIPPRYKLCVIPRS 493  
 MmCyp2E1 VTIGFGSIPREFKLCVIPRS 493  
 DrCyp2y3 ELSFANMPRFYELIASPR- 491  
 DrCyp2p6 YKLGTRAPKPFKCAVSR- 496  
 : \* : \* : \* : \*

**B**

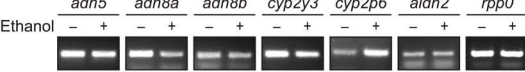

**C**

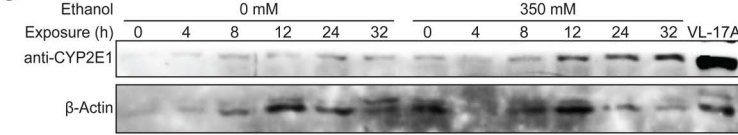

**D**

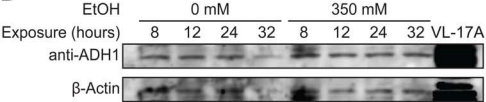

**E**

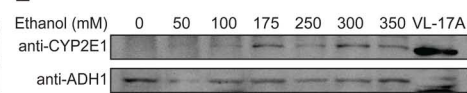

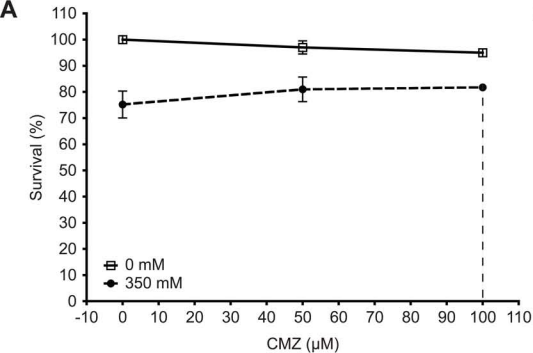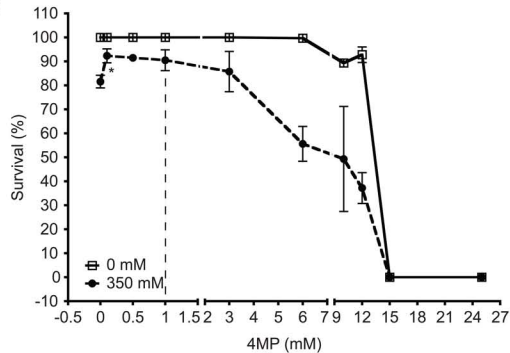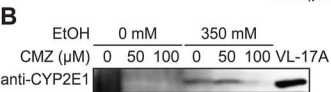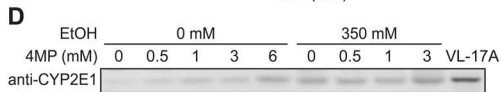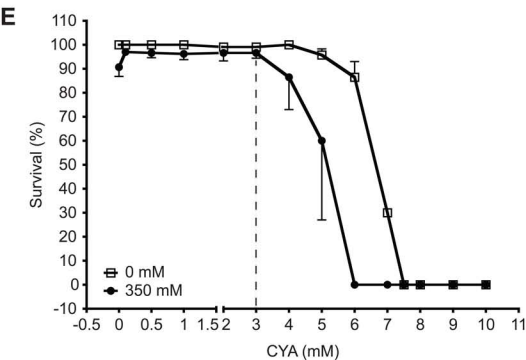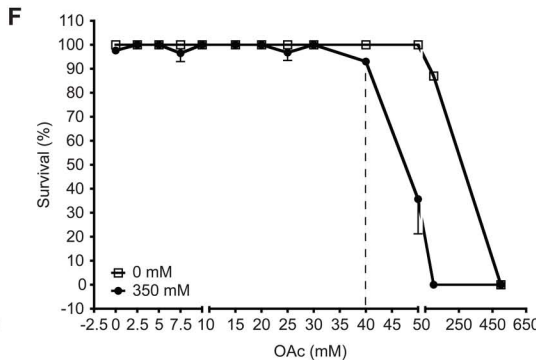



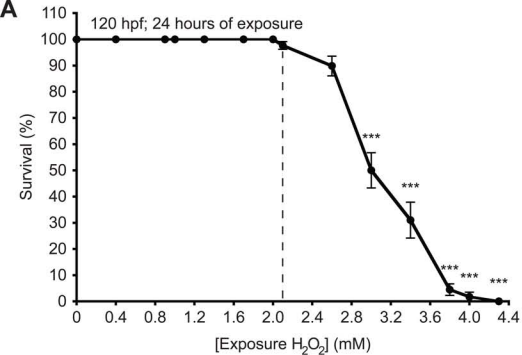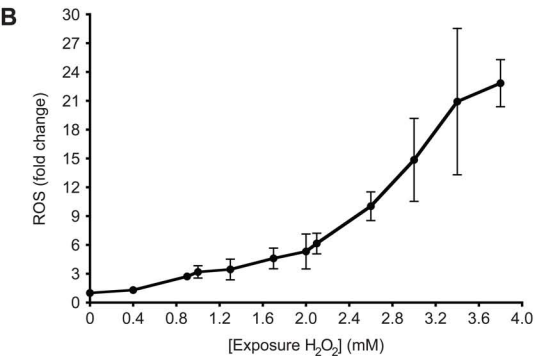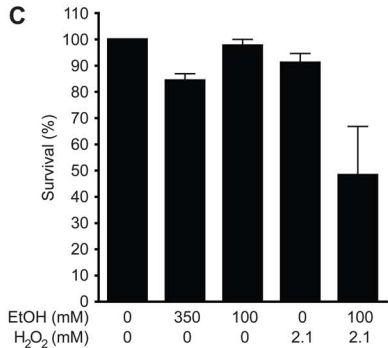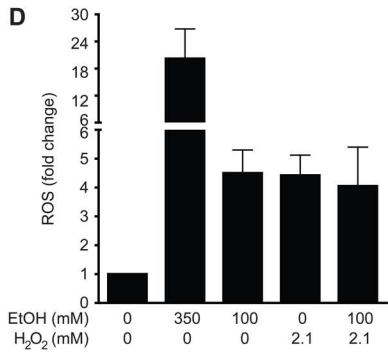

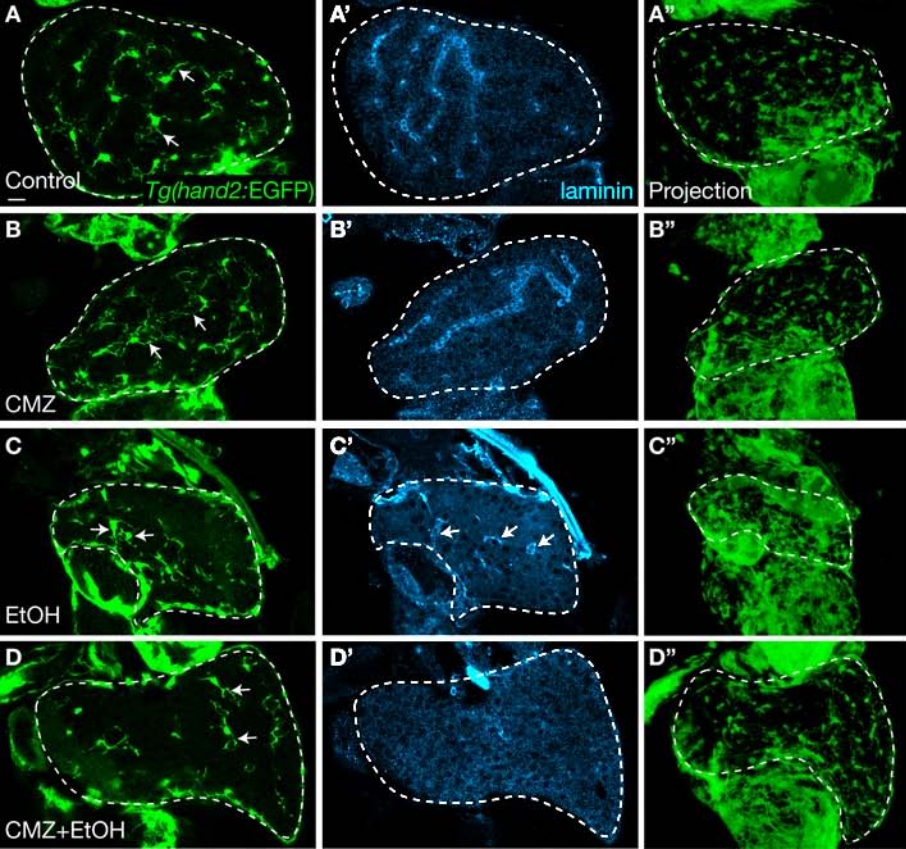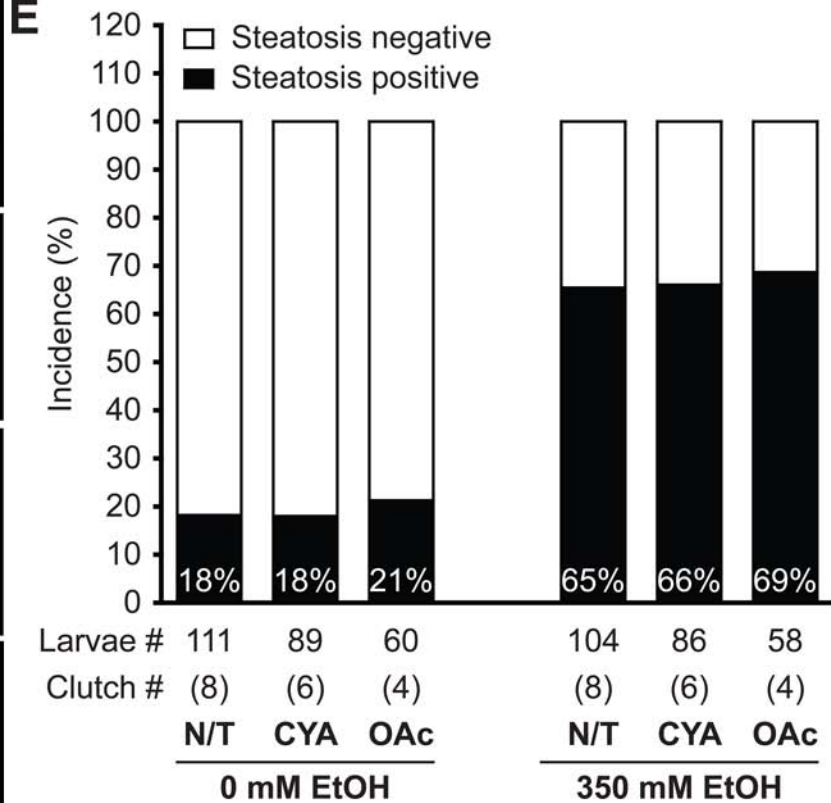

**Table S1.** Primer sequences used for conventional and quantitative, real-time PCR (qPCR)

| <b>Gene name</b> | <b>Forward</b>            | <b>Reverse</b>           |
|------------------|---------------------------|--------------------------|
| <b>alat</b>      | CATGTTGGGTCACAGTCAGG      | CGATTTTCAGGCTTGGAGAA     |
| <b>acc1</b>      | GCAAGTGTGGTTCCCTGATT      | TCATGAAGGTCAGCGAACTG     |
| <b>adh5</b>      | CCTTGAATTGAAGCCTGAGC      | CAACTGAAACCCGACACACA     |
| <b>adh8a</b>     | AGCTTTCTCTGCAGCTGTTTG     | GCCAAGGATTACTTTTTCTTGC   |
| <b>adh8b</b>     | ACAGATGGAAATTGAGACATTCC   | TTTCAACACGTGACAAGATCG    |
| <b>bip</b>       | ATCAGATCTGGCCAAAATGC      | CCACGTATGACGGAGTGATG     |
| <b>cat</b>       | CGCTTCTGTTTCCGTCTTTC      | GGAATCCCTCGATCACTGAA     |
| <b>cnx</b>       | CATCTCTGCCCTCCTACTGC      | TCCACAACTCCTCCAGGTC      |
| <b>cyp2p6</b>    | ACTGAGACCACCTCCACCAC      | CATTGGTGTAGGGCATGTTG     |
| <b>cyp2y3</b>    | TATTCCCATGCTGCACTCTG      | AGGAGCGTTTACCTGCAGAA     |
| <b>der11</b>     | TTTCGACTTGGTGACGACTG      | CAGAGCCCTCGTCACTTTTC     |
| <b>dnajc3</b>    | TCCCATGGATCCTGAGAGTC      | CTCCTGTGTGTGAGGGGTCT     |
| <b>edem1</b>     | GACAGCAGAAACCTCAAGC       | CATGGCCCTCATCTTGACTT     |
| <b>fasn</b>      | GAGAAAGCTTGCCAAACAGG      | GAGGGTCTTGCAGGAGACAG     |
| <b>gclc</b>      | AACCGACACCCAAAGATTGAGCACT | CCATCATCCTCTGGAAACACCTCC |
| <b>gpx1a</b>     | GTAAACCAGCGGCTTCTACG      | GGCACTTTAATCATGACTGCAC   |
| <b>gr</b>        | ATTGGCAGAGAACCCAACAC      | ACATCCCCGACTGCATAGAC     |
| <b>grp94</b>     | AGCAAGACCGAGACCGTAGA      | CTCCAATCCCACACAGTCT      |
| <b>hmgcra</b>    | CTGAGGCTCTGGTGGACGTG      | CGCCGCAGCTACGATGTTGGCG   |
| <b>hmgcs1</b>    | CTCACTCGTGTGGACGAGAA      | GATACGGGGCATCTTCTTGA     |
| <b>mvk</b>       | CACACTTTTGCGACCAGAGA      | CAGCAGCAATGAGCATCTGT     |
| <b>pdi</b>       | GATTCGGTGCCATCAGAGAT      | TCCAGTCACAGCGACCACTA     |
| <b>prdx1</b>     | CGCGAGTTCACTTTCATTCA      | TGACAAACGGACATCTCCAA     |
| <b>rpp0</b>      | CTGAACATCTCGCCCTTCTC      | TAGCCGATCTGCAGACACAC     |
| <b>saa</b>       | CGTGCCCTACCAGCATATGAA     | CAGCATCTGAATTGCCTCTG     |
| <b>scd</b>       | GGTGTGATGTGCTTCGTTG       | CCGATGTTTCCATCATAGGG     |
| <b>sod2</b>      | AGCGTGACTTTGGCTCATT       | ATGAGACCTGTGGTCCCTTG     |
| <b>srebp1</b>    | ACTCTTCTGGTGTGGCTGCT      | GAGCCTTCAGACACGTCCCTC    |
| <b>srebp2</b>    | CACTCACACAAGCACACACG      | ACCTGGTTCTGGATGAATCG     |
| <b>txn11</b>     | TCACAATGGCCTTCAATCAA      | CCAGACTCTGTGTGGCTTCA     |
| <b>txn14a</b>    | CACAATGGCTGGCAAGTAGA      | CTGGCACTTCTGTGATGTCC     |

Table S2. dCt values of qPCR results in Figure 4C

| Treatment   | Replicate | <i>gr</i>      | <i>txn11</i>   | <i>txn14</i>   | <i>gpx1</i>   | <i>sod2</i>   | <i>a1at</i>  | <i>saa</i>       |
|-------------|-----------|----------------|----------------|----------------|---------------|---------------|--------------|------------------|
| 0 mM EtOH   | 1         | 0.00210        | 0.00832        | 0.00149        | 0.1350        | 0.0141        | 2.537        | 0.0000195        |
|             | 2         | 0.00207        | 0.00714        | 0.00138        | 0.1480        | 0.0149        | 2.514        | 0.0000188        |
|             | 3         | 0.00288        | 0.00753        | 0.00125        | 0.1980        | 0.0191        | 2.502        | 0.0000193        |
|             | 4         | 0.00256        | 0.00873        | 0.00116        | 0.2040        | 0.0199        | 2.848        | 0.0000239        |
|             | 5         | 0.00174        | 0.00510        | 0.00097        | 0.0940        | 0.0213        | 2.537        | 0.0000026        |
|             | 6         | 0.00461        | 0.00960        | 0.00119        | 0.1470        | 0.0282        | 2.770        | 0.0000380        |
|             | Median    | <b>0.00233</b> | <b>0.00793</b> | <b>0.00122</b> | <b>0.1475</b> | <b>0.0195</b> | <b>2.537</b> | <b>0.0000194</b> |
| 350 mM EtOH | 1         | 0.01581        | 0.04737        | 0.00600        | 0.3060        | 0.0298        | 7.413        | 0.0001859        |
|             | 2         | 0.01506        | 0.04682        | 0.00638        | 0.2770        | 0.0296        | 7.013        | 0.0001271        |
|             | 3         | 0.01475        | 0.04230        | 0.00592        | 0.4530        | 0.0372        | 5.816        | 0.0001645        |
|             | 4         | 0.01690        | 0.05982        | 0.00677        | 0.5030        | 0.0342        | 6.558        | 0.0001618        |
|             | 5         | 0.01686        | 0.04533        | 0.00517        | 0.2270        | 0.0354        | 6.758        | 0.0000520        |
|             | 6         | 0.01625        | 0.04259        | 0.00456        | 0.3760        | 0.0364        | 6.869        | 0.0000457        |
|             | Median    | <b>0.01603</b> | <b>0.04608</b> | <b>0.00596</b> | <b>0.3410</b> | <b>0.0348</b> | <b>6.814</b> | <b>0.0001445</b> |
| CMZ + EtOH  | 1         | 0.01123        | 0.02210        | 0.00576        | 0.1950        | 0.0190        | 5.327        | 0.0000443        |
|             | 2         | 0.01007        | 0.01795        | 0.00545        | 0.1770        | 0.0160        | 5.266        | 0.0000362        |
|             | 3         | 0.01043        | 0.01833        | 0.00606        | 0.1810        | 0.0198        | 4.084        | 0.0000374        |
|             | 4         | 0.01033        | 0.02492        | 0.00589        | 0.1820        | 0.0201        | 4.879        | 0.0000213        |
|             | 5         | 0.04759        | 0.03139        | 0.00414        | 0.4160        | 0.0266        | 5.683        | 0.0000108        |
|             | 6         | 0.04859        | 0.03349        | 0.00506        | 0.3060        | 0.0271        | 6.049        | 0.0000057        |
|             | Median    | <b>0.01083</b> | <b>0.02351</b> | <b>0.00561</b> | <b>0.1885</b> | <b>0.0200</b> | <b>5.297</b> | <b>0.0000288</b> |
| 4MP + EtOH  | 1         | 0.02936        | 0.02498        | 0.00552        | 0.2730        | 0.0276        | 4.248        | 0.0000287        |
|             | 2         | 0.03380        | 0.02727        | 0.00663        | 0.2590        | 0.0320        | 4.367        | 0.0000325        |
|             | 3         | 0.03691        | 0.02604        | 0.00596        | 0.3410        | 0.0305        | 4.428        | 0.0000416        |
|             | 4         | 0.03303        | 0.03147        | 0.00556        | 0.3220        | 0.0260        | 4.902        | 0.0000235        |
|             | 5         | 0.01667        | 0.02001        | 0.00600        | 0.2470        | 0.0236        | 5.110        | 0.0000171        |
|             | 6         | 0.02071        | 0.02671        | 0.00774        | 0.2710        | 0.0241        | 5.040        | 0.0000042        |
|             | Median    | <b>0.03120</b> | <b>0.02638</b> | <b>0.00598</b> | <b>0.2720</b> | <b>0.0268</b> | <b>4.665</b> | <b>0.0000261</b> |
| AA + EtOH   | 1         | 0.01411        | 0.02330        | 0.00501        | 0.2040        | 0.0210        | 5.723        | 0.0000520        |
|             | 2         | 0.01434        | 0.00238        | 0.00507        | 0.1930        | 0.0238        | 5.696        | 0.0000264        |
|             | 3         | 0.01311        | 0.02200        | 0.00476        | 0.2300        | 0.0203        | 3.864        | 0.0000921        |
|             | 4         | 0.01434        | 0.02977        | 0.00491        | 0.2120        | 0.0171        | 3.724        | 0.0001060        |
|             | 5         | 0.01924        | 0.02396        | 0.00386        | 0.2630        | 0.0214        | 5.005        | 0.0000106        |
|             | 6         | 0.01982        | 0.03665        | 0.00411        | 0.2140        | 0.0242        | 6.394        | 0.0000088        |
|             | Median    | <b>0.01434</b> | <b>0.02363</b> | <b>0.00484</b> | <b>0.2130</b> | <b>0.0212</b> | <b>5.351</b> | <b>0.0000392</b> |
| NAC + EtOH  | 1         | 0.01746        | 0.01858        | 0.00513        | 0.2100        | 0.0223        | 4.387        | 0.0000190        |
|             | 2         | 0.01795        | 0.02390        | 0.00551        | 0.2410        | 0.0217        | 4.936        | 0.0000398        |
|             | 3         | 0.01659        | 0.02784        | 0.00603        | 0.2080        | 0.0247        | 4.735        | 0.0000564        |
|             | 4         | 0.01482        | 0.02876        | 0.00592        | 0.0020        | 0.0231        | 4.713        | 0.0000711        |
|             | 5         | 0.01485        | 0.03265        | 0.00345        | 0.2200        | 0.0185        | 4.387        | 0.0000154        |
|             | 6         | 0.01942        | 0.02896        | 0.00347        | 0.2630        | 0.0218        | 4.428        | 0.0000533        |
|             | Median    | <b>0.01703</b> | <b>0.02830</b> | <b>0.00532</b> | <b>0.2150</b> | <b>0.0221</b> | <b>4.571</b> | <b>0.0000466</b> |

Table S3. dCt values of qPCR results in Figure 5A

| Treatment   | Replicate | <i>bip</i>     | <i>dnajc3</i>  | <i>grp94</i>   | <i>edem1</i>  | <i>cnx</i>    | <i>pdi</i>    |
|-------------|-----------|----------------|----------------|----------------|---------------|---------------|---------------|
| 0 mM EtOH   | 1         | 0.0041         | 0.0016         | 0.0034         | 0.0037        | 0.0154        | 0.0819        |
|             | 2         | 0.0039         | 0.0019         | 0.0039         | 0.0039        | 0.0170        | 0.0894        |
|             | 3         | 0.0044         | 0.0018         | 0.0040         | 0.0032        | 0.0212        | 0.1058        |
|             | 4         | 0.0047         | 0.0018         | 0.0040         | 0.0036        | 0.0223        | 0.1096        |
|             | 5         | 0.0072         | 0.0018         | 0.0034         | 0.0035        | 0.0158        | 0.0726        |
|             | 6         | 0.0059         | 0.0030         | 0.0060         | 0.0059        | 0.0250        | 0.0958        |
|             | Median    | <b>0.00455</b> | <b>0.00180</b> | <b>0.00395</b> | <b>0.0037</b> | <b>0.0191</b> | <b>0.0926</b> |
| 350 mM EtOH | 1         | 0.2437         | 0.0261         | 0.1419         | 0.01392       | 0.1497        | 0.2186        |
|             | 2         | 0.2512         | 0.0262         | 0.1381         | 0.01317       | 0.1381        | 0.176         |
|             | 3         | 0.1601         | 0.0239         | 0.1098         | 0.01495       | 0.1365        | 0.198         |
|             | 4         | 0.1998         | 0.0254         | 0.1049         | 0.01636       | 0.1282        | 0.2171        |
|             | 5         | 0.1731         | 0.0308         | 0.0896         | 0.01152       | 0.1207        | 0.1843        |
|             | 6         | 0.1708         | 0.0275         | 0.1256         | 0.01326       | 0.1227        | 0.2146        |
|             | Median    | <b>0.18645</b> | <b>0.02615</b> | <b>0.11770</b> | <b>0.0136</b> | <b>0.1324</b> | <b>0.2063</b> |
| CMZ + EtOH  | 1         | 0.1692         | 0.0249         | 0.0992         | 0.01257       | 0.118         | 0.1843        |
|             | 2         | 0.1553         | 0.0239         | 0.002          | 0.01243       | 0.0963        | 0.1731        |
|             | 3         | 0.1571         | 0.0236         | 0.0907         | 0.01146       | 0.1196        | 0.1788        |
|             | 4         | 0.1568         | 0.025          | 0.0804         | 0.01209       | 0.1219        | 0.1539        |
|             | 5         | 0.0902         | 0.0145         | 0.0423         | 0.01139       | 0.1145        | 0.1939        |
|             | 6         | 0.1413         | 0.016          | 0.0742         | 0.0132        | 0.1108        | 0.1882        |
|             | Median    | <b>0.15605</b> | <b>0.02375</b> | <b>0.07730</b> | <b>0.0123</b> | <b>0.1163</b> | <b>0.1816</b> |
| 4MP + EtOH  | 1         | 0.13000        | 0.01510        | 0.06180        | 0.01125       | 0.10980       | 0.13460       |
|             | 2         | 0.13490        | 0.01720        | 0.07250        | 0.01332       | 0.12190       | 0.15000       |
|             | 3         | 0.12560        | 0.01740        | 0.07160        | 0.01206       | 0.12670       | 0.16690       |
|             | 4         | 0.13210        | 0.01690        | 0.07020        | 0.01252       | 0.11030       | 0.17840       |
|             | 5         | 0.13240        | 0.01910        | 0.06350        | 0.01335       | 0.14290       | 0.19480       |
|             | 6         | 0.10410        | 0.01580        | 0.05790        | 0.01357       | 0.12970       | 0.15710       |
|             | Median    | <b>0.13105</b> | <b>0.01705</b> | <b>0.06685</b> | <b>0.0129</b> | <b>0.1243</b> | <b>0.1620</b> |
| AA + EtOH   | 1         | 0.14100        | 0.02100        | 0.07750        | 0.01100       | 0.09430       | 0.20310       |
|             | 2         | 0.11850        | 0.02350        | 0.07450        | 0.01120       | 0.10340       | 0.18510       |
|             | 3         | 0.05160        | 0.01510        | 0.03920        | 0.00931       | 0.08320       | 0.14000       |
|             | 4         | 0.05430        | 0.01590        | 0.04090        | 0.00749       | 0.08480       | 0.12790       |
|             | 5         | 0.08840        | 0.01410        | 0.03400        | 0.00933       | 0.10610       | 0.18220       |
|             | 6         | 0.10270        | 0.01590        | 0.05280        | 0.01115       | 0.10370       | 0.20450       |
|             | Median    | <b>0.09555</b> | <b>0.01590</b> | <b>0.04685</b> | <b>0.0102</b> | <b>0.0989</b> | <b>0.1837</b> |
| NAC + EtOH  | 1         | 0.16880        | 0.02150        | 0.10580        | 0.01107       | 0.12470       | 0.17470       |
|             | 2         | 0.19430        | 0.02530        | 0.12560        | 0.01281       | 0.11290       | 0.20540       |
|             | 3         | 0.11850        | 0.01940        | 0.08040        | 0.01125       | 0.11320       | 0.18640       |
|             | 4         | 0.11770        | 0.02040        | 0.06950        | 0.01168       | 0.11400       | 0.17470       |
|             | 5         | 0.03550        | 0.00910        | 0.01850        | 0.00736       | 0.08780       | 0.13270       |
|             | 6         | 0.02500        | 0.01120        | 0.02230        | 0.00973       | 0.09360       | 0.19030       |
|             | Median    | <b>0.11810</b> | <b>0.01990</b> | <b>0.07495</b> | <b>0.0112</b> | <b>0.1131</b> | <b>0.1806</b> |

**Table S4.** dCt values of qPCR results in Figure 5D

| Treatment                                | Replicate     | <i>bip</i>      | <i>dnajc3</i>   | <i>grp94</i>    | <i>edem1</i>    | <i>cnx</i>      |
|------------------------------------------|---------------|-----------------|-----------------|-----------------|-----------------|-----------------|
| <b>0 mM EtOH</b>                         | <b>1</b>      | 0.002613        | 0.001025        | 0.002947        | 0.003408        | 0.013018        |
|                                          | <b>2</b>      | 0.002913        | 0.001030        | 0.003401        | 0.003738        | 0.015303        |
|                                          | <b>3</b>      | 0.003988        | 0.001205        | 0.002583        | 0.002743        | 0.010821        |
|                                          | <b>4</b>      | 0.002879        | 0.000905        | 0.002218        | 0.003037        | 0.007903        |
|                                          | <b>5</b>      | 0.005238        | 0.001590        | 0.003440        | 0.003645        | 0.015553        |
|                                          | <b>6</b>      | 0.002438        | 0.001111        | 0.002371        | 0.002285        | 0.010525        |
|                                          | <b>Median</b> | <b>0.002896</b> | <b>0.001071</b> | <b>0.002765</b> | <b>0.003223</b> | <b>0.011920</b> |
| <b>100 mM EtOH</b>                       | <b>1</b>      | 0.005002        | 0.001328        | 0.005202        | 0.003424        | 0.016326        |
|                                          | <b>2</b>      | 0.004743        | 0.001337        | 0.004809        | 0.003704        | 0.017257        |
|                                          | <b>3</b>      | 0.003670        | 0.001583        | 0.004044        | 0.003817        | 0.012007        |
|                                          | <b>4</b>      | 0.003180        | 0.001194        | 0.003738        | 0.002461        | 0.009142        |
|                                          | <b>5</b>      | 0.003308        | 0.001793        | 0.003870        | 0.003970        | 0.012402        |
|                                          | <b>6</b>      | 0.005025        | 0.002988        | 0.006331        | 0.004539        | 0.012809        |
|                                          | <b>Median</b> | <b>0.004206</b> | <b>0.001460</b> | <b>0.004427</b> | <b>0.003761</b> | <b>0.012605</b> |
| <b>2.1 mM H<sub>2</sub>O<sub>2</sub></b> | <b>1</b>      | 0.038119        | 0.007025        | 0.057114        | 0.006770        | 0.047366        |
|                                          | <b>2</b>      | 0.041426        | 0.006073        | 0.054284        | 0.006031        | 0.051237        |
|                                          | <b>3</b>      | 0.186856        | 0.007512        | 0.105355        | 0.005786        | 0.043788        |
|                                          | <b>4</b>      | 0.141610        | 0.010237        | 0.118257        | 0.006928        | 0.046930        |
|                                          | <b>5</b>      | 0.062789        | 0.008790        | 0.049721        | 0.004865        | 0.032804        |
|                                          | <b>6</b>      | 0.034118        | 0.004016        | 0.022718        | 0.004245        | 0.025208        |
|                                          | <b>Median</b> | <b>0.052108</b> | <b>0.007268</b> | <b>0.055699</b> | <b>0.005908</b> | <b>0.045359</b> |
| <b>H<sub>2</sub>O<sub>2</sub> + EtOH</b> | <b>1</b>      | 0.079844        | 0.010120        | 0.067921        | 0.009530        | 0.058449        |
|                                          | <b>2</b>      | 0.085773        | 0.010453        | 0.075887        | 0.010356        | 0.077482        |
|                                          | <b>3</b>      | 0.092569        | 0.006003        | 0.042296        | 0.006101        | 0.045123        |
|                                          | <b>4</b>      | 0.103426        | 0.007256        | 0.073642        | 0.003799        | 0.039922        |
|                                          | <b>5</b>      | 0.300756        | 0.007634        | 0.089415        | 0.003852        | 0.050649        |
|                                          | <b>6</b>      | 0.102238        | 0.013508        | 0.086170        | 0.007357        | 0.052922        |
|                                          | <b>Median</b> | <b>0.097403</b> | <b>0.008877</b> | <b>0.074764</b> | <b>0.006729</b> | <b>0.051785</b> |

**Table S5.** dCt values of qPCR results in Figure 5E

| Treatment                            | Replicate     | <i>gr</i>       | <i>txn1</i>     | <i>txn14</i>    | <i>gpx1</i>     | <i>sod2</i>     | <i>cat</i>      | <i>gclc</i>     | <i>prdx1</i>     |
|--------------------------------------|---------------|-----------------|-----------------|-----------------|-----------------|-----------------|-----------------|-----------------|------------------|
| 0 mM EtOH                            | 1             | 0.002088        | 0.007885        | 0.001456        | 0.192109        | 0.017257        | 0.075016        | 0.003108        | 0.0000314        |
|                                      | 2             | 0.001612        | 0.006723        | 0.001689        | 0.186425        | 0.017020        | 0.078201        | 0.003173        | 0.0000089        |
|                                      | 3             | 0.001265        | 0.010027        | 0.001197        | 0.148651        | 0.015198        | 0.069348        | 0.004710        | 0.0000043        |
|                                      | 4             | 0.001878        | 0.008649        | 0.001337        | 0.185137        | 0.015058        | 0.069992        | 0.005386        | 0.0000072        |
|                                      | 5             | 0.001673        | 0.012316        | 0.002589        | 0.177595        | 0.020857        | 0.083427        | 0.005373        | 0.0000272        |
|                                      | 6             | 0.004007        | 0.009775        | 0.001047        | 0.163421        | 0.014017        | 0.053909        | 0.004843        | 0.0000205        |
|                                      | <b>Median</b> | <b>0.001775</b> | <b>0.009212</b> | <b>0.001397</b> | <b>0.181366</b> | <b>0.016109</b> | <b>0.072504</b> | <b>0.004776</b> | <b>0.0000147</b> |
| 100 mM EtOH                          | 1             | 0.006880        | 0.007529        | 0.001869        | 0.263645        | 0.019641        | 0.086170        | 0.005119        | 0.0000523        |
|                                      | 2             | 0.006785        | 0.006615        | 0.002208        | 0.253490        | 0.020428        | 0.082279        | 0.005563        | 0.0000430        |
|                                      | 3             | 0.007616        | 0.010027        | 0.001494        | 0.190782        | 0.011733        | 0.054788        | 0.005448        | 0.0000226        |
|                                      | 4             | 0.008354        | 0.010623        | 0.001325        | 0.207809        | 0.014147        | 0.070316        | 0.006976        | 0.0000541        |
|                                      | 5             | 0.006479        | 0.011571        | 0.002461        | 0.205423        | 0.020240        | 0.091717        | 0.006073        | 0.0000929        |
|                                      | 6             | 0.008201        | 0.010004        | 0.001368        | 0.168404        | 0.016289        | 0.057247        | 0.005826        | 0.0000206        |
|                                      | <b>Median</b> | <b>0.007248</b> | <b>0.010015</b> | <b>0.001682</b> | <b>0.206616</b> | <b>0.017965</b> | <b>0.076298</b> | <b>0.005694</b> | <b>0.0000476</b> |
| 2.1 mM H <sub>2</sub> O <sub>2</sub> | 1             | 0.003058        | 0.013292        | 0.002650        | 0.258816        | 0.032728        | 0.073302        | 0.006215        | 0.0000472        |
|                                      | 2             | 0.003756        | 0.012721        | 0.002559        | 0.246558        | 0.029839        | 0.066986        | 0.005772        | 0.0000367        |
|                                      | 3             | 0.003424        | 0.019148        | 0.001035        | 0.127332        | 0.022302        | 0.017020        | 0.003888        | 0.0000724        |
|                                      | 4             | 0.007940        | 0.019550        | 0.002393        | 0.269184        | 0.046284        | 0.056851        | 0.004550        | 0.0000680        |
|                                      | 5             | 0.004843        | 0.013109        | 0.001627        | 0.221186        | 0.027457        | 0.035239        | 0.005934        | 0.0000581        |
|                                      | 6             | 0.003897        | 0.011177        | 0.002339        | 0.248847        | 0.015446        | 0.058449        | 0.006230        | 0.0000216        |
|                                      | <b>Median</b> | <b>0.003827</b> | <b>0.013200</b> | <b>0.002366</b> | <b>0.247703</b> | <b>0.028648</b> | <b>0.057650</b> | <b>0.005853</b> | <b>0.0000527</b> |
| H <sub>2</sub> O <sub>2</sub> + EtOH | 1             | 0.007652        | 0.020193        | 0.002093        | 0.257623        | 0.034118        | 0.028623        | 0.005373        | 0.0001641        |
|                                      | 2             | 0.008451        | 0.024014        | 0.002781        | 0.302149        | 0.045753        | 0.032502        | 0.007812        | 0.0001988        |
|                                      | 3             | 0.006585        | 0.011491        | 0.001477        | 0.201660        | 0.026645        | 0.031540        | 0.006646        | 0.0000843        |
|                                      | 4             | 0.005962        | 0.019060        | 0.001579        | 0.130912        | 0.027712        | 0.012988        | 0.005263        | 0.0000879        |
|                                      | 5             | 0.008912        | 0.025091        | 0.002218        | 0.184710        | 0.029839        | 0.013792        | 0.010574        | 0.0001637        |
|                                      | 6             | 0.008953        | 0.022406        | 0.003464        | 0.226880        | 0.031395        | 0.041714        | 0.005588        | 0.0000978        |
|                                      | <b>Median</b> | <b>0.008051</b> | <b>0.021299</b> | <b>0.002156</b> | <b>0.214270</b> | <b>0.030617</b> | <b>0.030082</b> | <b>0.006117</b> | <b>0.0001307</b> |
